# Supplementary material for: Investigation of copper oxidation states in plasmonic nanomaterials by XAS and Raman spectroscopy
Source: Royal Society of Chemistry journal article supplement (doi:10.1039/c9cp06478h), 2019-12-21
Supplement: c9cp06478h1.pdf [file c9cp06478h1.pdf]

# Investigation of copper oxidation states in plasmonic nanomaterials by XAS and Raman spectroscopy

*Clémence Queffélec, Florian Forato, Bruno Bujoli, Andrew Knight, Emiliano Fonda, and Bernard Humbert*

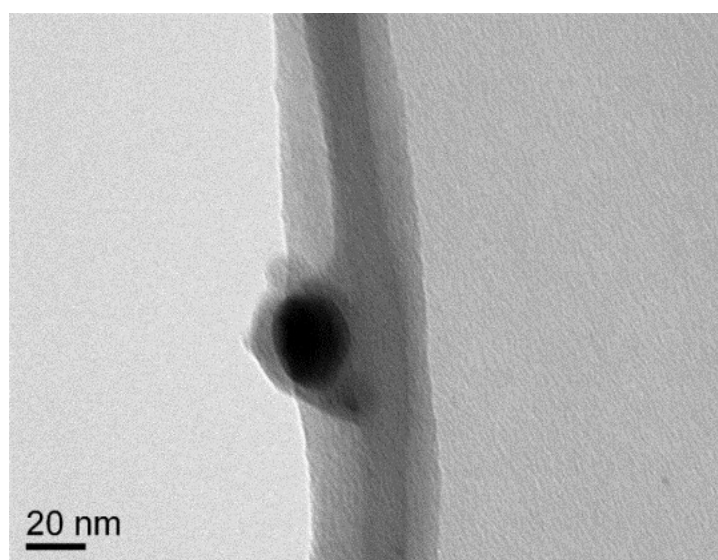

**Figure S1 :** TEM image of Ag@TiO<sub>2</sub>@bpy-PA-Cu(I).

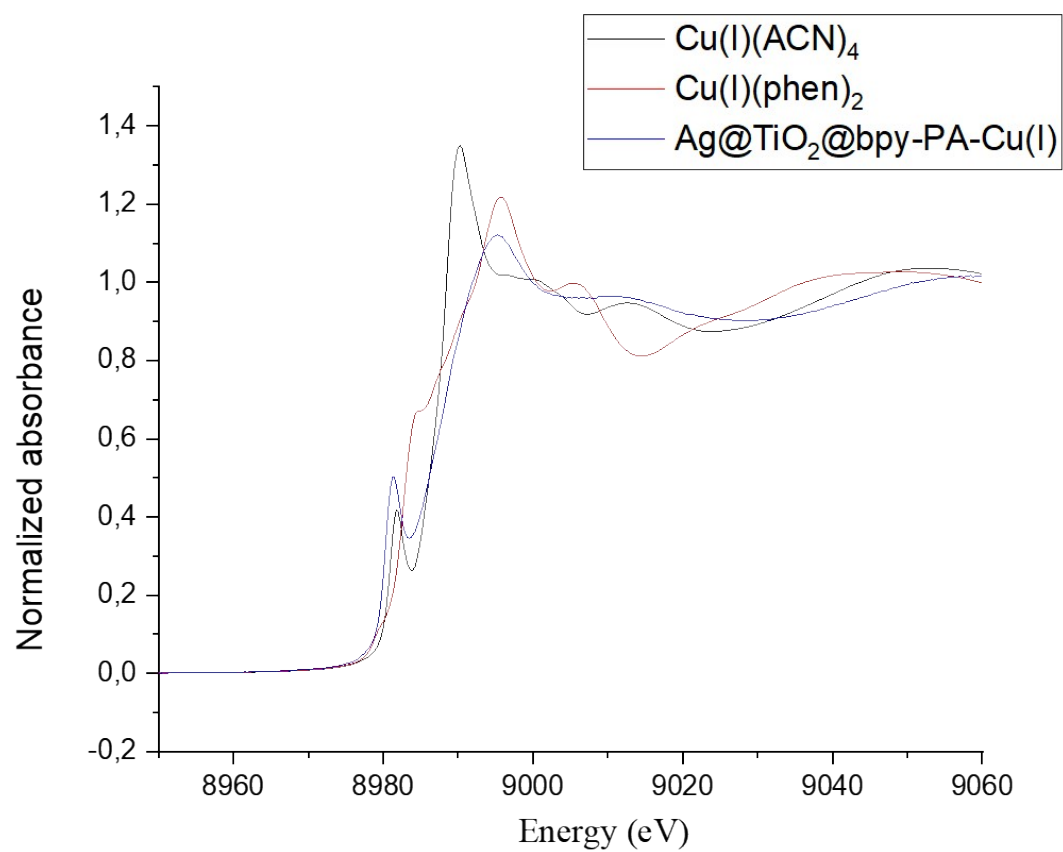

**Figure S2 :** Normalized absorbance vs E spectrum for copper(I) samples. Black :  $\text{Cu(ACN)}_4\text{PF}_6^-$ , red :  $\text{Cu(I)(phen)}_2$ , blue :  $\text{Ag@TiO}_2\text{@bpy-PA-Cu(I)}$

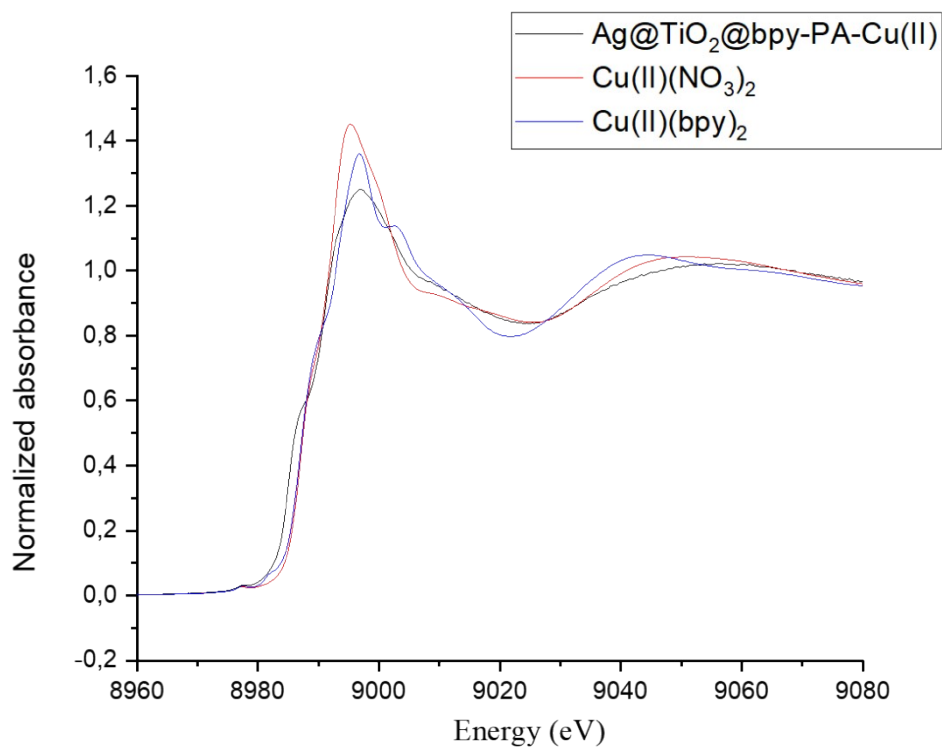

**Figure S3 :** Normalized absorbance vs E spectrum for copper(II) samples. Red: Cu(NO<sub>3</sub>)<sub>2</sub> • 2.5H<sub>2</sub>O, blue : Cu(II)(bpy)<sub>2</sub>, black : Ag@TiO<sub>2</sub>@bpy-PA-Cu(II)

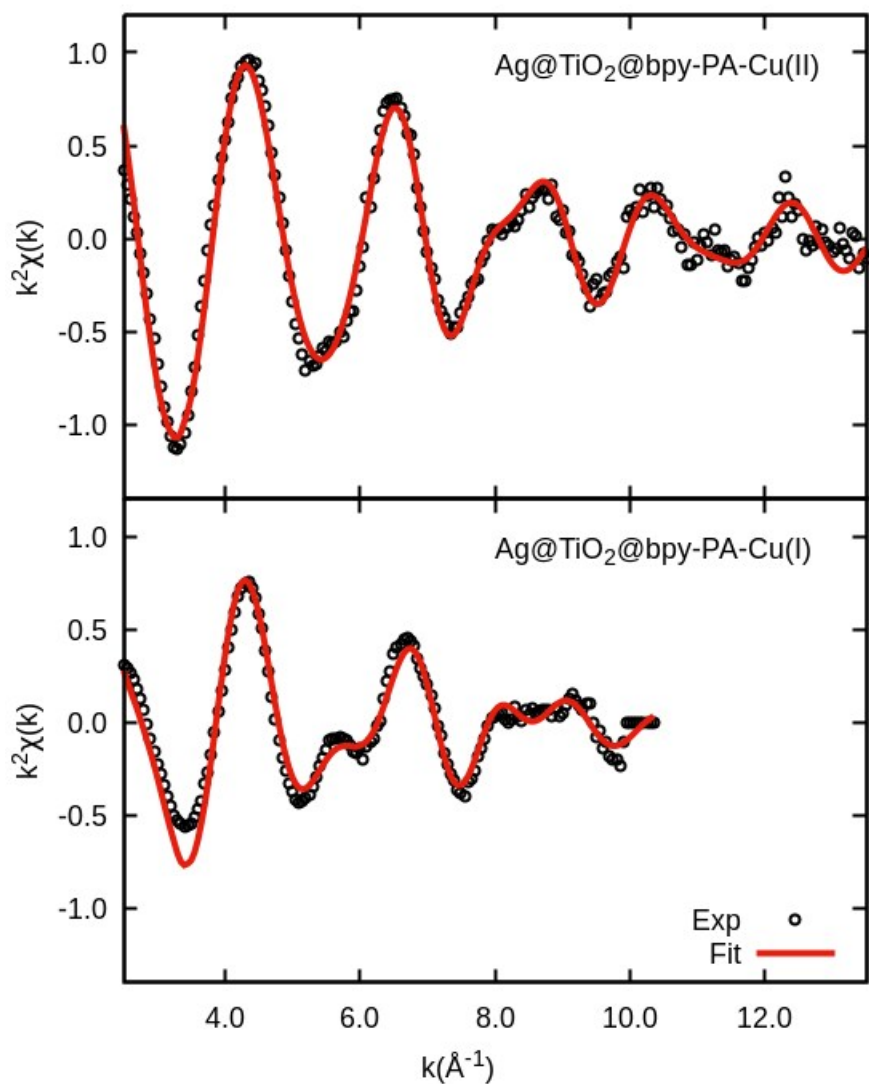

**Figure S4 :**  $k^2$  weighted EXAFS (Exp.) and simulated (Fit) curves of  $\text{Ag@TiO}_2\text{@bpy-PA-Cu(II)}$  (top) and  $\text{Ag@TiO}_2\text{@bpy-PA-Cu(I)}$  (bottom) complexes in  $k$ -space. The Cu(I) spectrum has been shortened due to the presence of an artifact at higher  $k$  values.

**Table S1.** Numerical results of EXAFS fittings including contributions beyond nearest neighbors. EXAFS is not strongly sensitive to the nature of the backscattering atom, neighboring atoms in a periodic table line can be easily confused as C, N and O, and attribution of these atoms to C, N or O is based on our *a priori* and then knowledge of ligands chemistry. In this case, data match closely bpy geometry.

| <b>Ag@TiO<sub>2</sub><br/>@bpy-PA-<br/>Cu(I)</b>  | <b>N</b> | <b>R<br/>(Å)</b> | <b><math>\sigma^2</math><br/>(10<sup>-3</sup>Å<sup>2</sup>)</b> |
|---------------------------------------------------|----------|------------------|-----------------------------------------------------------------|
| <b>N</b>                                          | 2        | 1.90(1)          | 3(1)                                                            |
| <b>O</b>                                          | 1        | 2.04(2)          |                                                                 |
| <b>C1</b>                                         | 2        | 2.83(2)          | 3(2)                                                            |
| <b>C2</b>                                         | 2        | 3.24(3)          |                                                                 |
| <b>Ag@TiO<sub>2</sub><br/>@bpy-PA-<br/>Cu(II)</b> | <b>N</b> | <b>R<br/>(Å)</b> | <b><math>\sigma^2</math><br/>(10<sup>-3</sup>Å<sup>2</sup>)</b> |
| <b>N</b>                                          | 4        | 1.95(1)          | 5(2)                                                            |
| <b>O1</b>                                         | 1        | 2.44(4)          |                                                                 |
| <b>O2</b>                                         | 1        | 2.62(5)          |                                                                 |
| <b>C1</b>                                         | 4        | 2.92(3)          | 9(5)                                                            |
| <b>C2</b>                                         |          | 3.27(2)          |                                                                 |

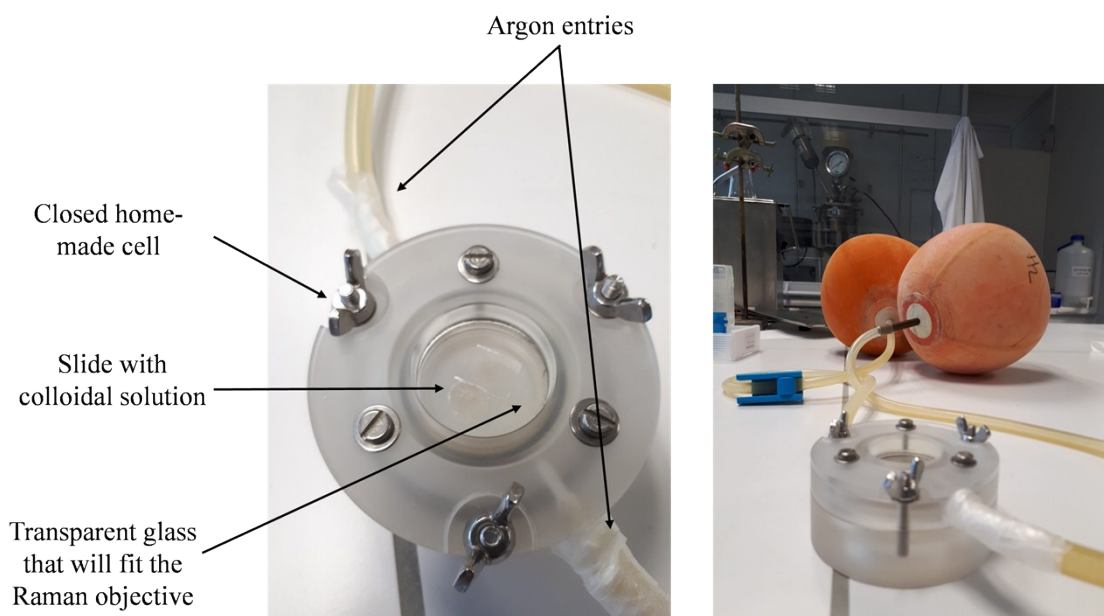

**Figure S5 :** Home-made cell used for Raman spectroscopy

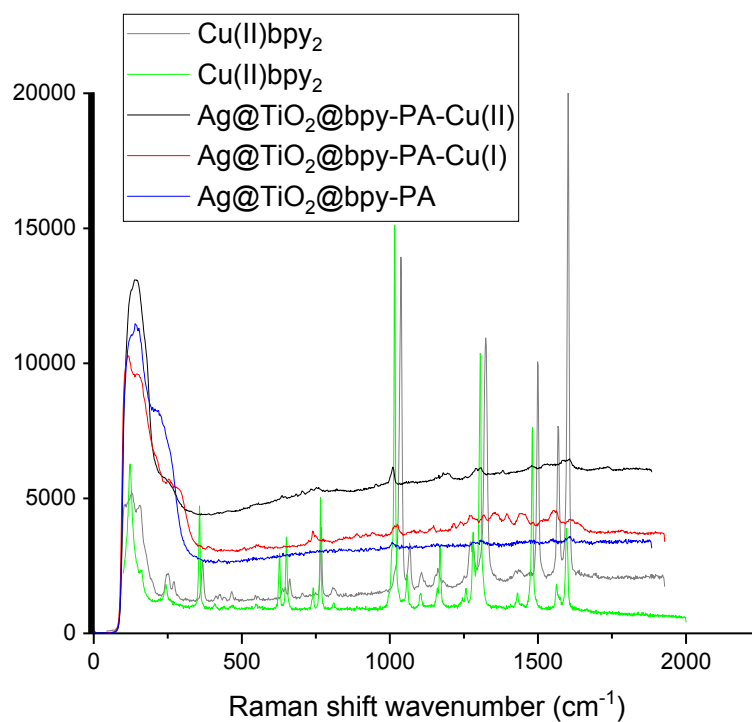

**Figure S6 :** Comparison of Raman spectrum of  $\text{Ag@TiO}_2\text{@bpy-PA}$ ,  $\text{Ag@TiO}_2\text{@bpy-PA-Cu(I)}$ ,  $\text{Ag@TiO}_2\text{@bpy-PA-Cu(II)}$ ,  $\text{Cu(I)-bpy}_2$  and  $\text{Cu(II)-bpy}_2$  at 633 nm.
